# Supplementary material
Source: publisher figshare collection journal article supplement (https://sage.figshare.com/ndownloader/files/23553644)
Supplement: Supplementary file 1 [file 23553644]

# Probing the pore structure of hierarchical EU-1 zeolites by adsorption of large molecules and through catalytic reaction

Zaibin Guo, Wenming Hao\*, Jinghong Ma\*, Ruifeng Li

College of Chemistry and Chemical Engineering, Taiyuan University of Technology, Taiyuan 030024, P.R. of China

Figure

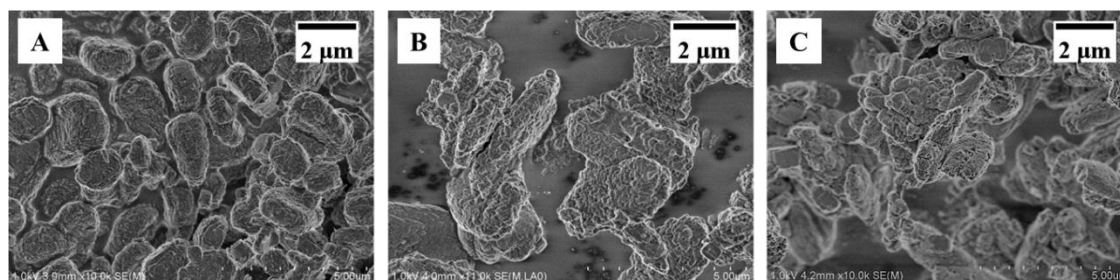

Figure S1. SEM images of EU-1 zeolites: A, EU-1-0; B, EU-1-1; C, EU-1-2
